# Supplementary material
Source: Springer Nature journal article supplement (https://www.springermedizin.de/resource/supplementary/12865_2012_520_MOESM1_ESM.pdf/9428124)

**A**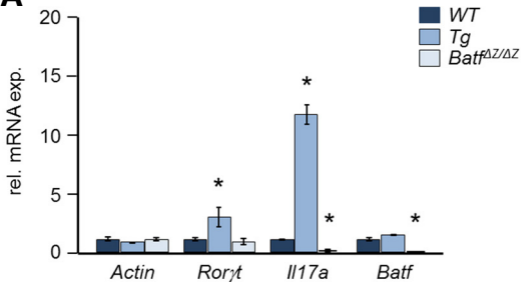**B**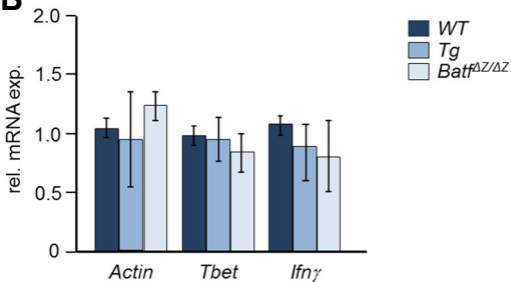**C**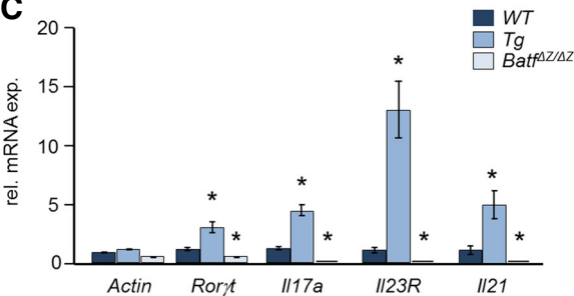

Supplement: MOESM1 [file 9428124]
